# Supplementary material for: Impact of temporary methotrexate discontinuation for 2 weeks on immunogenicity of seasonal influenza vaccination in patients with rheumatoid arthritis: a randomised clinical trial
Source: PubMed Central journal article supplement — Ann Rheum Dis. 2018 Mar 23;77(6):898–904. doi: 10.1136/annrheumdis-2018-213222 (PMC5965360; doi:10.1136/annrheumdis-2018-213222), 2018-03-23

**Supplementary Material.**

**Temporary methotrexate discontinuation for two weeks improves immunogenicity of seasonal influenza vaccination in patients with rheumatoid arthritis: a randomized clinical trial.**

Jin Kyun Park, Yun Jong Lee, Kichul Shin, Eun-Ha Kang, You-Jung Ha, Yun Jong Lee, Eun Young Lee, Yeong Wook Song, Yunhee Choi, Kevin L Winthrop, Eun Bong Lee.

**Supplementary table 1.** Antibody titers, fold-changes and vaccine response before and after vaccination with patients according to seroprotection.

**Supplementary table 2.** Antibody titers, fold-changes and vaccine response before and after vaccination to individual vaccine strains in Per-Protocol population.

**Supplementary figure 1.** Study design.

**Supplementary figure 2.** Satisfactory response in Per-Protocol population

**Supplementary table 1.** Antibody titers, fold-changes and vaccine response before and after vaccination with patients according to baseline seroprotection status in MITT population.

|                      | Seroprotection negative |                      |                  | Seroprotection positive |                       |       |
|----------------------|-------------------------|----------------------|------------------|-------------------------|-----------------------|-------|
|                      | Group 1                 | Group 2              | p                | Group 1                 | Group 2               | P     |
| <b>H1N1</b>          | N= 118                  | N= 114               |                  | N=38                    | N=46                  |       |
| Pre-vacc titer, GMT  | 9.5 (8.5 - 10.6)        | 9.8 (8.7 – 11.0)     | 0.692            | 59.5 (51.1 - 69.3)      | 56.6 (48.7 - 65.7)    | 0.637 |
| Post-vacc titer, GMT | 57.4 (45.7 - 72.1)      | 100.0 (79.2 - 126.4) | <b>0.001</b>     | 118.1 (92.4 - 150.9)    | 132.2 (104.3 - 167.6) | 0.508 |
| Fold increase, GM    | 6.1 (4.7 - 7.8)         | 10.2 (7.9 - 13.3)    | <b>0.005</b>     | 2.0 (1.6 - 2.4)         | 2.3 (1.9 - 2.9)       | 0.291 |
| Response, n (%)      | 71 (60.2)               | 83 (72.8)            | 0.052            | 8 (21.1)                | 17 (37.0)             | 0.151 |
| Pre-vacc SP, n (%)   | 0 (0)                   | 0 (0)                |                  | 38 (100)                | 46 (100)              | 1.000 |
| Post-vacc SP, n (%)  | 81 (68.6)               | 92 (80.7)            | <b>0.049</b>     | 37 (97.4)               | 46 (100)              | 0.268 |
| <b>H3N2</b>          | N=135                   | N=139                |                  | N=21                    | N=21                  |       |
| Pre-vacc titer, GMT  | 7.5 (6.9 - 8.2)         | 8.0 (7.2 - 8.8)      | 0.403            | 69.2 (50.0 - 95.7)      | 69.5 (50.2 - 96.3)    | 0.980 |
| Post-vacc titer, GMT | 37.6 (30.4 - 46.4)      | 75.9 (61.4 - 93.8)   | <b>&lt;0.001</b> | 119.5 (89.7 - 159.4)    | 168.6 (112.3 - 253.2) | 0.158 |
| Fold increase, GM    | 5.0 (4.0 - 6.2)         | 9.5 (7.6 - 11.9)     | <b>&lt;0.001</b> | 1.7 (1.3 - 2.3)         | 2.4 (1.4 - 4.1)       | 0.235 |
| Response, n (%)      | 81 (60.0)               | 108 (77.7)           | <b>0.002</b>     | 4 (19.0)                | 6 (28.6)              | 0.719 |
| Pre-vacc SP, n (%)   | 0 (0)                   | 0 (0)                | 0                | 21 (100)                | 21 (100)              | 1.000 |
| Post-vacc SP, n (%)  | 76 (56.3)               | 105 (75.5)           | <b>0.001</b>     | 21 (100)                | 20 (95.2)             | 0.311 |
| <b>B-Yamagata</b>    | N=96                    | N=109                |                  | N=60                    | N=51                  |       |
| Pre-vacc titer, GMT  | 10.7 (9.4 - 12.1)       | 12.6 (11.3 – 14.0)   | 0.045            | 73.4 (62.2 - 86.6)      | 60.9 (52.8 - 70.3)    | 0.096 |
| Post-vacc titer, GMT | 44.7 (34.5 - 57.8)      | 90.4 (72.7 - 112.4)  | <b>&lt;0.001</b> | 145.7 (118.0 – 180.0)   | 195.8 (155.7 - 246.2) | 0.060 |

|                      |                    |                    |                  |                    |                       |                  |
|----------------------|--------------------|--------------------|------------------|--------------------|-----------------------|------------------|
| Fold increase, GM    | 4.2 (3.2 - 5.5)    | 7.2 (5.8 - 8.9)    | <b>0.002</b>     | 2.0 (1.6 - 2.4)    | 3.2 (2.6 - 4.0)       | <b>0.001</b>     |
| Response, n (%)      | 49 (51.0)          | 76 (69.7)          | <b>0.007</b>     | 17 (28.3)          | 28 (54.9)             | <b>0.006</b>     |
| Pre-vacc SP, n (%)   | 96 (100)           | 109 (100)          | 1.000            | 60 (100)           | 51 (100)              | 1.000            |
| Post-vacc SP, n (%)  | 57 (59.4)          | 90 (82.6)          | <b>&lt;0.001</b> | 59 (98.3)          | 51 (100)              | 0.354            |
| <b>B-Victoria</b>    | N=123              | N=139              |                  | N=33               | N=21                  |                  |
| Pre-vacc titer, GMT  | 9.9 (8.9 - 10.9)   | 9.4 (8.5 - 10.3)   | 0.479            | 49.1 (43.0 - 56.1) | 49.7 (41.0 - 60.3)    | 0.910            |
| Post-vacc titer, GMT | 33.3 (27.4 - 40.5) | 57.8 (49.3 - 67.8) | <b>&lt;0.001</b> | 74.7 (57.2 - 97.6) | 165.0 (118.0 - 230.5) | <b>&lt;0.001</b> |
| Fold increase, GM    | 3.4 (2.8 - 4.1)    | 6.2 (5.2 - 7.3)    | <b>&lt;0.001</b> | 1.5 (1.2 - 2)      | 3.3 (2.5 - 4.4)       | <b>&lt;0.001</b> |
| Response, n (%)      | 60 (48.8)          | 104 (74.8)         | <b>&lt;0.001</b> | 4 (12.1)           | 14 (66.7)             | <b>&lt;0.001</b> |
| Pre-vacc SP, n (%)   | 0 (0)              | 0 (0)              | 1.000            | 33 (100)           | 21 (100)              | 1.000            |
| Post-vacc SP, n (%)  | 64 (52.0)          | 100 (71.9)         | <b>&lt;0.001</b> | 31 (93.9)          | 21 (100)              | 0.250            |

Data are expressed in n (%) or value (95% CI). Antibody titers and fold increase are in geometric mean titer (GMT). Satisfactory vaccine response (i.e. response = seroconversion) was defined as a  $\geq 4$ -fold improvement in titers relative to baseline. Seroprotection was defined as titers of  $\geq 1:40$ . P values were generated by independent t-test for continuous variables and chi-square test for categorical variables.

CI, confidential interval; GM, geometric mean; GMT, geometric mean titer; n, number; Pre-SP, prevaccination seroprotection rate; Post-SP, postvaccination seroprotection rate.

**Supplementary table 2.** Antibody titers, fold-changes and vaccine response before and after vaccination to individual vaccine strains in Per-Protocol population.

|                               | <b>MTX continue</b> | <b>MTX hold</b>      | <b>P</b>         |
|-------------------------------|---------------------|----------------------|------------------|
|                               | <b>(n=154)</b>      | <b>(n=157)</b>       |                  |
| <b>H1N1</b>                   |                     |                      |                  |
| Pre-vacc titer, GMT (95% CI)  | 14.8 (12.7 - 17.3)  | 16.2 (13.9 - 18.9)   | 0.329            |
| Post-vacc titer, GMT (95% CI) | 68.4 (56.8 - 82.4)  | 108.4 (90.7 - 129.5) | <b>0.001</b>     |
| Fold increase, GM (95% CI)    | 4.6 (3.7 - 5.7)     | 6.7 (5.4 - 8.3)      | <b>0.035</b>     |
| Response, n (%)               | 78 (50.6)           | 97 (61.8)            | <b>0.048</b>     |
| Pre-vacc SP, n (%)            | 37 (24.0)           | 46 (29.3)            | 0.293            |
| Post-vacc SP, n (%)           | 116 (75.3)          | 135 (86.0)           | <b>0.017</b>     |
| <b>H3N2</b>                   |                     |                      |                  |
| Pre-vacc titer, GMT (95% CI)  | 10.2 (8.8 - 11.8)   | 10.6 (9.1 - 12.3)    | 0.755            |
| Post-vacc titer, GMT (95% CI) | 43.9 (36.1 - 53.4)  | 84.3 (69.3 - 102.4)  | <b>&lt;0.001</b> |
| Fold increase, GM (95% CI)    | 4.3 (3.5 - 5.3)     | 8 (6.4 - 9.9)        | <b>&lt;0.001</b> |
| Response, n (%)               | 83 (53.9)           | 111 (70.7)           | <b>0.002</b>     |
| Pre-vacc SP, n (%)            | 21 (13.6)           | 20 (12.7)            | 0.815            |
| Post-vacc SP, n (%)           | 97 (63.0)           | 123 (78.3)           | <b>0.003</b>     |
| <b>B-Yamagata</b>             |                     |                      |                  |
| Pre-vacc titer, GMT (95% CI)  | 22.4 (18.7 - 26.7)  | 20.8 (18.1 - 24)     | 0.720            |
| Post-vacc titer, GMT (95% CI) | 70.4 (57.8 - 85.7)  | 115.6 (97.4 - 137.3) | <b>&lt;0.001</b> |
| Fold increase, GM (95% CI)    | 3.1 (2.6 - 3.8)     | 5.6 (4.7 - 6.6)      | <b>&lt;0.001</b> |
| Response, n (%)               | 66 (42.9)           | 101 (64.3)           | <b>&lt;0.001</b> |
| Pre-vacc SP, n (%)            | 59 (38.3)           | 51 (32.5)            | 0.283            |
| Post-vacc SP, n (%)           | 115 (74.7)          | 139 (88.5)           | <b>0.002</b>     |

**B-Victoria**

|                               |                    |                    |                  |
|-------------------------------|--------------------|--------------------|------------------|
| Pre-vacc titer, GMT (95% CI)  | 13.8 (12.1 - 15.8) | 11.7 (10.3 - 13.2) | 0.083            |
| Post-vacc titer, GMT (95% CI) | 39.5 (33.3 - 46.9) | 66.3 (56.8 - 77.4) | <b>&lt;0.001</b> |
| Fold increase, GM (95% CI)    | 2.9 (2.4 - 3.4)    | 5.7 (4.9 - 6.7)    | <b>&lt;0.001</b> |
| Response, n (%)               | 64 (41.6)          | 115 (73.2)         | <b>&lt;0.001</b> |
| Pre-vacc SP, n (%)            | 32 (20.8)          | 21 (13.4)          | 0.083            |
| Post-vacc SP, n (%)           | 94 (61.0)          | 119 (75.8)         | <b>0.005</b>     |

---

Data are expressed in n (%) or value (95% CI). Antibody titers and fold increase are in geometric mean titer (GMT). Satisfactory vaccine response (i.e. response = seroconversion) was defined as a  $\geq 4$ -fold improvement in titers relative to baseline. Seroprotection was defined as titers of  $\geq 1:40$ . P values were generated by independent t-test for continuous variables and chi-square test for categorical variables.

CI, confidential interval; GM, geometric mean; GMT, geometric mean titer; n, number; Pre-SP, prevaccination seroprotection rate; Post-SP, postvaccination seroprotection rate.

**Supplementary figure 1. Study rationale and design.** (A) A pilot study was conducted to estimate the efficacy and time of temporary MTX discontinuation to improve vaccine response. Group 2, where MTX was discontinued before vaccination, did not improve in vaccination response, suggesting that MTX discontinuation before the vaccination did not affect vaccine response. Groups 3 and 4, where MTX was stopped after vaccination, did show higher vaccine response than the reference group 1 (MTX continue group). Therefore, the “overlapping” 2 weeks after vaccination in Groups 3 and 4 is the critical period for vaccine response. (B) In this trial, patients were randomized to continue or hold MTX for 2 weeks after vaccination. HI=hemagglutination inhibition; MTX=methotrexate; mon=months; wk=week.

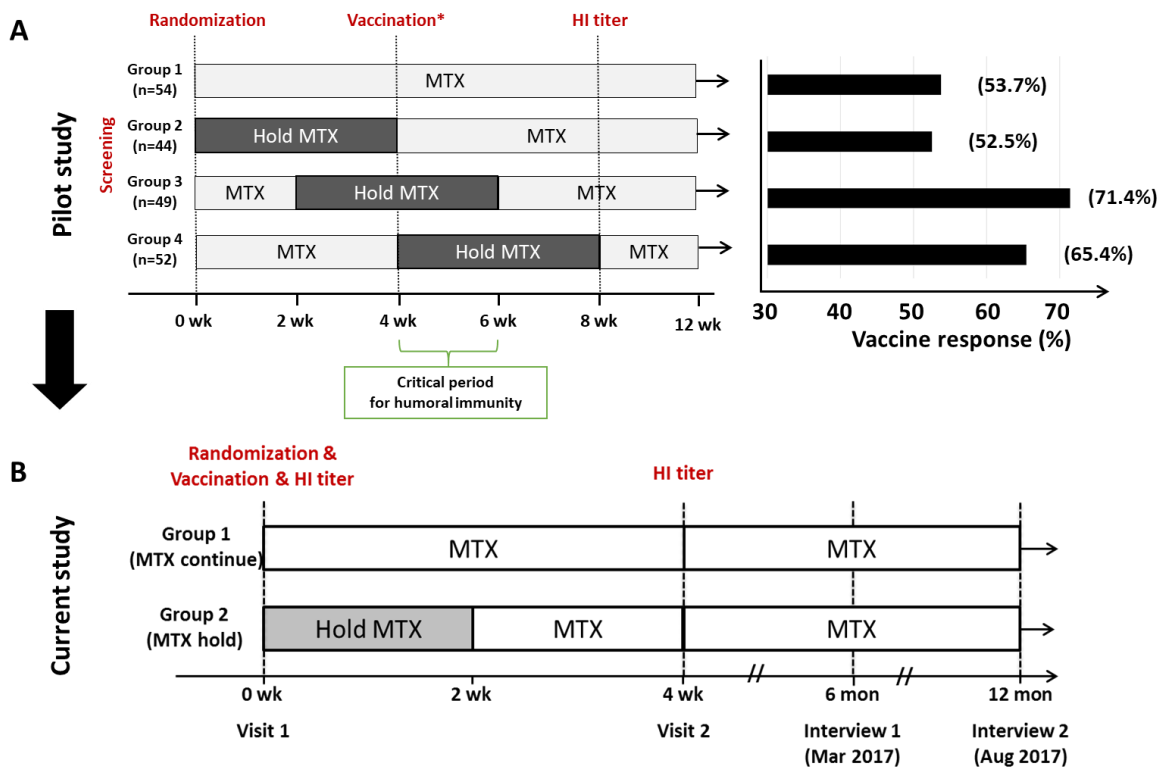

Supplementary figure 2. Satisfactory response in Per-Protocol population

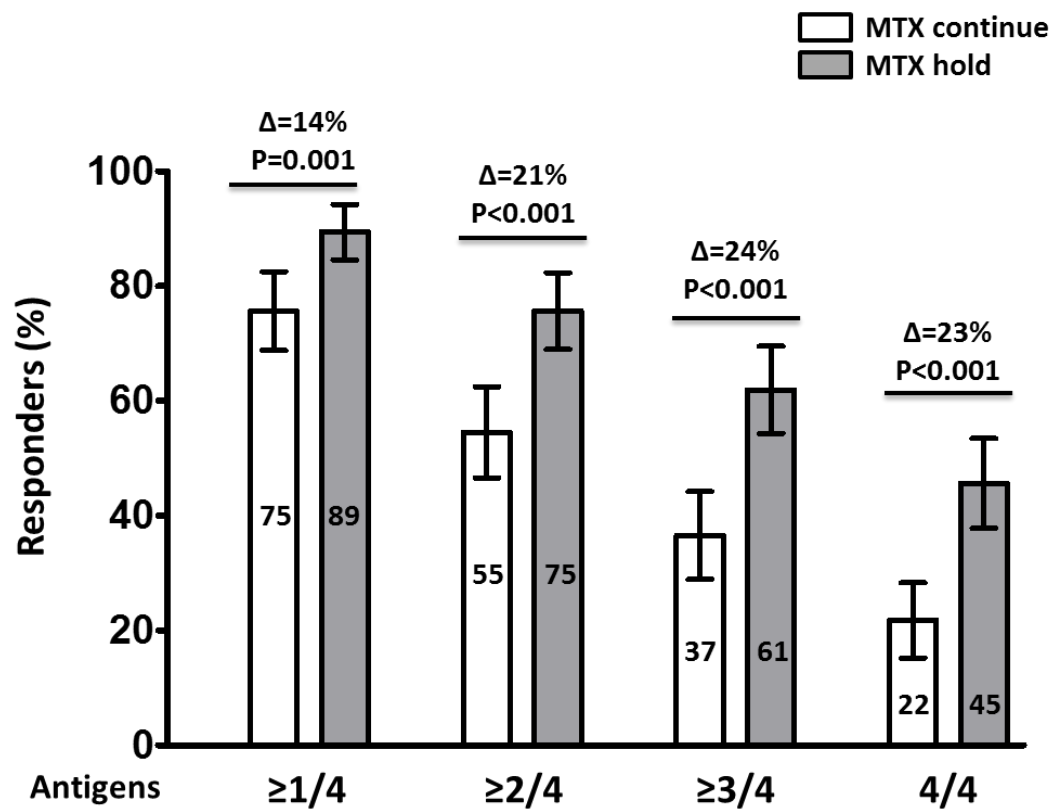

Supplement: annrheumdis-2018-213222supp001.pdf [file annrheumdis-2018-213222supp001.pdf]
